# Supplementary material
Source: publisher site journal article supplement (https://www.spandidos-publications.com/1284/downloadSupplementary)
Supplement: Supplementary file 1 [file downloadSupplementary]

## Sheet: Appendix Table S2
	Table SI. Information concerning the antibodies used in the present study.
	Antigen	Source	Catalog no.	Application
	VEGF receptor 2	Cell Signaling Technology	2479	Western blotting
	Phospho-Y1175 VEGFR2	Cell Signaling Technology	2478	Western blotting
	ERK1/2 (p44/p42 MAPK)	Cell Signaling Technology	9101	Western blotting
	p-T202/Y204 ERK1/2	Cell Signaling Technology	9102	Western blotting
	GAPDH	Cell Signaling Technology	2118	Western blotting
	Mouse IgG2B control	R&D Systems, #20116	MAB004	Neutralisation
	VEGF-A (mouse IgG2B)	R&D Systems, #26503	MAB293	Neutralisation
	Polyclonal rabbit IgG control	Thermo Fisher Scientific, Inc.	NC-100-P1ABX	Neutralisation
	Galectin-1 (rabbit IgG)	Peprotech	500-P210	Neutralisation
	CTGF (rabbit IgG)	LifeSpan BioSciences	LS-B7479	Neutralisation
	Normal goat IgG control	R&D Systems, polyclonal	AB-108-C	Neutralisation
	OPN (goat IgG)	R&D Systems, polyclonal	AF1433	Neutralisation
	Mouse IgG1 control	R&D Systems, #11711	MAB002	Neutralisation
	CXCL8/IL-8 (mouse IgG1)	R&D Systems, #6217	MAB208	Neutralisation
	MIF (mouse IgG1)	Merck Millipore, M1	MABF111	Neutralisation
	Galectin-3 (mouse IgG1)	Santa Cruz Biotechnology, B2C10	sc-32790	Neutralisation
	IL-18 Ra (mouse IgG1)	R&D Systems, #70625	MAB840	Neutralisation
	IL-18 Rb (mouse IgG1)	R&D Systems, #132016	MAB1181	Neutralisation
	Midkine (MK, C-18)	Santa Cruz Biotechnology	sc-1396	Western blotting
	HDGF (C-14)-R	Santa Cruz Biotechnology	sc-28064-R	Western blotting
	Granulin	Adipogen	AG-20A-0052	Western blotting
	BDNF (rabbit IgG)	GeneTex	GTX16327	Neutralisation
	FGF-2 (goat IgG)	R&D Systems, polyclonal	AF-233	Neutralisation/ Western blotting
	FGF-5	R&D Systems, polyclonal	AF-237	Neutralisation
	FGF-2 (mouse IgG1)	Merck Millipore, bFM-1	05-117	Neutralisation
